# A Pituitary-Derived MEG3 Isoform Functions as a Growth Suppressor in Tumor Cells

XUN ZHANG, YUNLI ZHOU, KSHAMA R. MEHTA, DANIEL C. DANILA, STACI SCOLAVINO, STACEY R. JOHNSON, AND ANNE KLIBANSKI

Neuroendocrine Unit, Massachusetts General Hospital and Harvard Medical School, Boston, Massachusetts 02114

Human pituitary adenomas are the most common intracranial neoplasm. Typically monoclonal in origin, a somatic mutation is a prerequisite event in tumor development. To identify underlying pathogenetic mechanisms in tumor formation, we compared the difference in gene expression between normal human pituitary tissue and clinically nonfunctioning pituitary adenomas by cDNA-representational difference analysis. We cloned a cDNA, the expression of which was absent in these tumors, that represents a novel transcript from the previously described *MEG3*, a maternal imprinting gene with unknown function. It was expressed in normal human gonadotrophs, from which clinically nonfunctioning pituitary

adenomas are derived. Additional investigation by Northern blot and RT-PCR demonstrated that this gene was also not expressed in functioning pituitary tumors as well as many human cancer cell lines. Moreover, ectopic expression of this gene inhibits growth in human cancer cells including HeLa, MCF-7, and H4. Genomic analysis revealed that *MEG3* is located on chromosome 14q32.3, a site that has been predicted to contain a tumor suppressor gene involved in the pathogenesis of meningiomas. Taken together, our data suggest that *MEG3* may represent a novel growth suppressor, which may play an important role in the development of human pituitary adenomas. (*J Clin Endocrinol Metab* 88: 5119–5126, 2003)

HUMAN PITUITARY ADENOMAS are the most common intracranial neoplasm, comprising approximately 10% of all diagnosed brain tumors (1, 2). Secretory adenomas produce one or more pituitary hormones such as prolactin, GH, ACTH, and TSH, causing phenotypic clinical syndromes. A significant percentage of macroadenomas is clinically nonfunctioning and does not cause syndromes of hormone overproduction. However, these tumors, typically of gonadotroph cell origin, can cause considerable morbidity because of mass effect, resulting in cranial nerve compression syndromes, other neurological deficits, and the development of hypopituitarism (1–3). Pituitary adenomas are typically monoclonal in origin, and a somatic mutation is a requisite event in tumor formation (4–6). However, mechanisms that underlie selective clonal proliferation remain elusive. Investigation of commonly known oncogenes and tumor suppressor genes, such as *ras*, *MEN-1*, *c-myc*, *Rb*, *p53*, *nm23*, and *gsp*, has revealed that none of these genes are involved in the pathogenesis of the majority of human pituitary tumors (7–9). The recently identified pituitary tumor-transforming gene (*PTTG*) has been shown to have increased expression in pituitary tumors (10–14), and the functions of this gene are still under investigation. In the majority of human pituitary tumors, the identification of specific causal genetic rearrangements, deletions, or mutations remains unknown.

To identify the molecular events responsible for the development of human pituitary tumors, we have compared the difference in gene expression between the normal human pituitary and clinically nonfunctioning pituitary adenomas by cDNA-representational difference analysis (RDA) (15). We identified a novel cDNA that is an alternatively spliced

isoform of a previously reported transcript from a maternal imprinting gene, *MEG3*, with unknown function (16). Here, we report the molecular cloning, expression, and antiproliferative function of this *MEG3* cDNA isoform.

## Materials and Methods

### Molecular cloning of *MEG3a*

A 200-bp N-terminal fragment of *MEG3* cDNA, isolated by RDA from the normal pituitary (15), was used to screen a human fetal liver library (Clontech, Palo Alto, CA). The cDNAs from the positive clones were subcloned into pBlueScript-SK (Stratagene, La Jolla, CA) via the 5'-EcoRI and 3'-NotI sites, and their sequences were analyzed. The sequence information was used to search GenBank and the Human Genome Sequence Draft to reveal its identity, chromosomal localization, and genomic structure, at the web site National Center for Biotechnology Information ([www.ncbi.nlm.nih.gov](http://www.ncbi.nlm.nih.gov)).

### Construction of plasmid for expression

The *MEG3* cDNA isoform *MEG3a* (see Fig. 1A for sequence), obtained from the library screening, was cloned into pCI-neo (Promega, Madison, WI) via the 5'-EcoRI and 3'-NotI sites to generate a mammalian expression vector, pCI-neo-*MEG3a*, which was used in the colony formation and growth rate assays.

### RNA preparation, dot blot and Northern blot hybridization, and RT-PCR

Total RNA from the tumor samples or cultured cells was isolated using TRIzol Reagent (Invitrogen, Carlsbad, CA) according to manufacturer's protocol. This study was approved by the Massachusetts General Hospital Subcommittee for Human Studies. For Northern blot, 20  $\mu$ g of each RNA sample were analyzed by electrophoresis in a 1% agarose-formaldehyde gel, blotted onto Hybond-N transfer membrane (Amersham, Piscataway, NJ), cross-linked by UV, and baked at 80 C in a vacuum oven. The membrane was probed with <sup>32</sup>P-labeled, full-length *MEG3a* cDNA using UltraHyb solution (Ambion, Austin, TX). mRNA levels were standardized with  $\beta$ -actin. For the tissue distribution study, a quantitative human tissue blot membrane was purchased from Clontech. The RNA amount from each tissue blotted on this membrane was

Abbreviations: EST, Expressed sequence tag; FSH- $\beta$ ,  $\beta$ -subunit of FSH; ORF, open reading frame; RDA, representational difference analysis; SSC, standard saline-citrate.

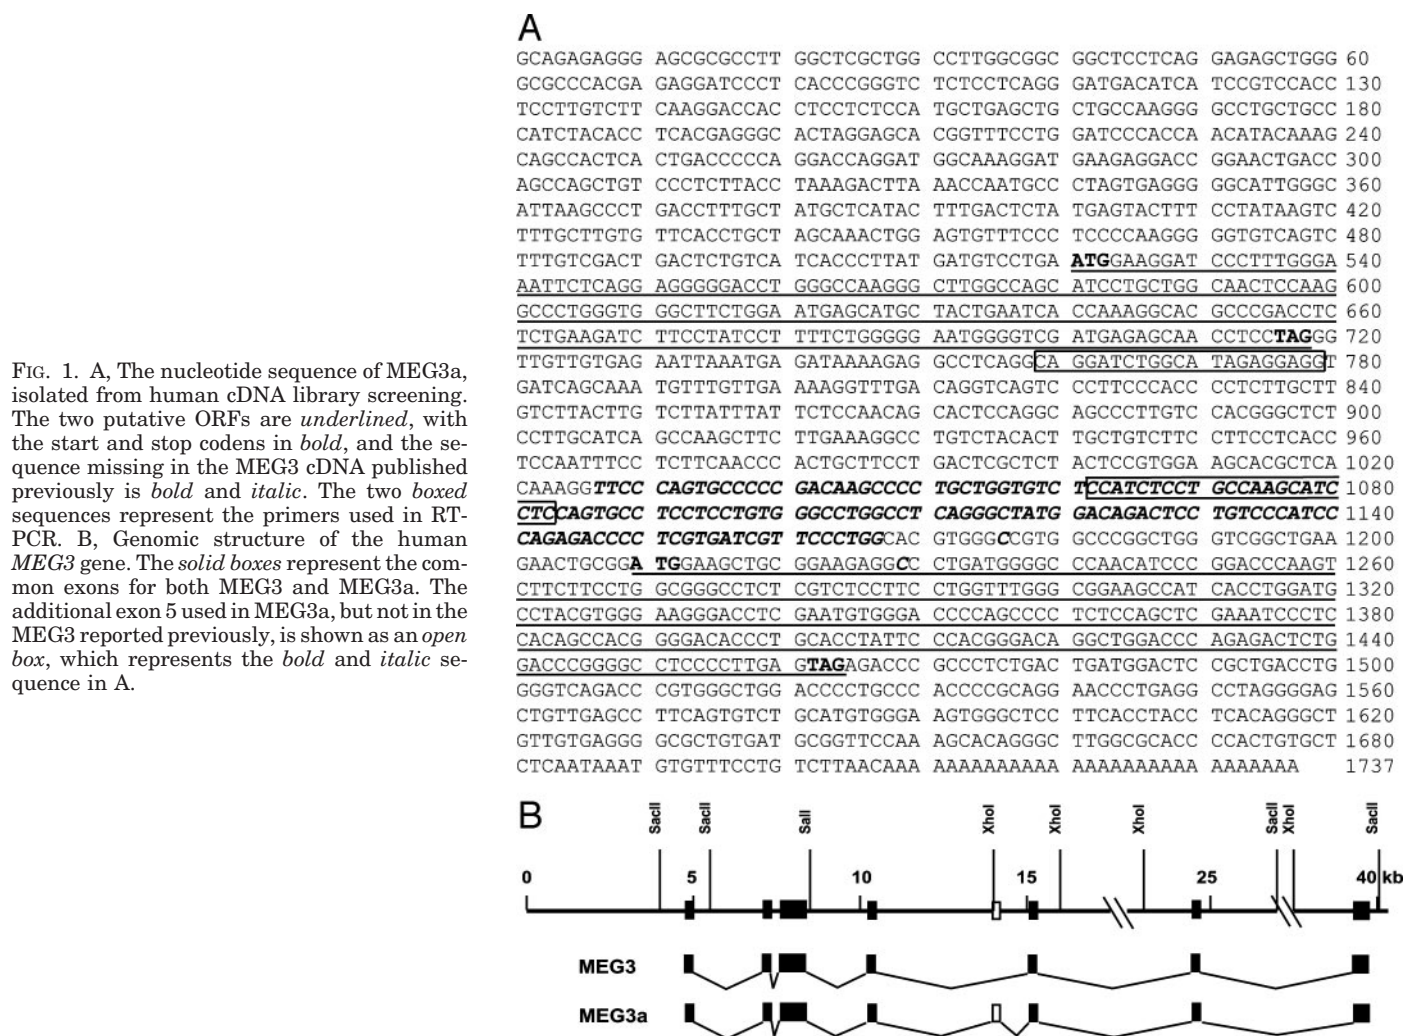

FIG. 1. A, The nucleotide sequence of MEG3a, isolated from human cDNA library screening. The two putative ORFs are *underlined*, with the start and stop codons in *bold*, and the sequence missing in the MEG3 cDNA published previously is *bold and italic*. The two boxed sequences represent the primers used in RT-PCR. B, Genomic structure of the human MEG3 gene. The *solid boxes* represent the common exons for both MEG3 and MEG3a. The additional exon 5 used in MEG3a, but not in the MEG3 reported previously, is shown as an *open box*, which represents the *bold and italic* sequence in A.

normalized with eight different housekeeping gene products to ensure the proper quantitation. This blot was hybridized with  $^{32}$ P-labeled, full-length MEG3a cDNA using Express-Hyb solution (Clontech). RT-PCR was performed as described previously (17). The primers used to amplify MEG3 cDNA were 5'-CAGGATCTGGCATAGAGGAGG-3' and 5'-GAGGATGCTTGGCAGGAGATGG-3'. [This primer recognizes a sequence specific to the MEG3a isoform obtained from our library screening. This sequence is not present in the previously reported expressed sequence tag (EST) clone of MEG3.] The primers for cyclophilin A as a control were 5'-CATGGTCAACCCACCGTGTCTT-3' and 5'-TAGATGGACTTGCCACCAGTGCCAT-3'.

#### *In situ hybridization and immunohistochemical staining*

Digoxigenin-labeled RNA probes (sense and antisense) of human MEG3a as well as GH and the  $\beta$ -subunit of FSH (FSH- $\beta$ ) (for controls) were generated by *in vitro* transcription from the cloned cDNA in pBlue-Script-SK using the DIG RNA labeling kit (Roche, Indianapolis, IN), according to the manufacturer's instructions. Antibody against FSH- $\beta$  was obtained from the National Hormone and Pituitary Program (sponsored by the National Institutes of Health; Torrance, CA). Other secondary antibodies were purchased from Roche. Normal human pituitary glands (containing both anterior and posterior) were obtained 2–16 h postmortem from the Harvard Brain Tissue Resource Center (Belmont, MA) and fixed with 4% paraformaldehyde for 3–4 h, rinsed with PBS, washed with 30% sucrose, sectioned (4  $\mu$ m) by a cryostat, and stored at  $-80^{\circ}\text{C}$ . For *in situ* hybridization, sections warmed to room temperature were rinsed briefly in DEPC- $\text{H}_2\text{O}$  and PBS, then treated with 0.1 M triethanolamine for 2 min and 0.25% acetic anhydride in 0.1 M trieth-

anolamine for 10 min. After rinsing with  $2\times$  standard saline-citrate (SSC), prehybridization was performed at room temperature for 1 h, with 50% deionized formamide,  $4\times$  SSC, 10% dextran sulfate,  $1\times$  Denhardt's solution, and 0.25 mg/ml yeast RNA. The sections were then rinsed briefly with  $2\times$  SSC and hybridized in the same solution containing 1  $\mu\text{g}/\text{ml}$  RNA probe at  $42^{\circ}\text{C}$  overnight. After hybridization, the sections were washed serially in  $2\times$  SSC at room temperature for 1 h,  $1\times$  SSC at room temperature for 1 h,  $0.5\times$  SSC at  $37^{\circ}\text{C}$  for 30 min, and  $0.5\times$  SSC at room temperature for 30 min. To detect the hybridization signals, the sections were incubated in 0.1 N HCl for 2 min to block nonspecific staining; rinsed with 100 mM Tris-HCl (pH 7.5) and 150 mM NaCl; and incubated first with 100 mM Tris-HCl (pH 7.5), 150 mM NaCl, 0.3% Triton X-100, and 2% BSA for 30 min at room temperature and then with 100 mM Tris-HCl (pH 7.5), 150 mM NaCl, 0.3% Triton X-100, and 1% BSA containing an antidigoxigenin antibody conjugated with alkaline phosphatase for 3 h. Hybridization signals were detected using colorimetric reaction by incubation with 5-bromo-4-chloro-3-indolylphosphate/nitro-blue tetrazolium solution. Cellular nuclei were visualized by staining with Mayer's hematoxylin solution (Sigma, St. Louis, MO).

To observe the colocalization of MEG3a and FSH- $\beta$ , the tissue slides were first used for *in situ* hybridization with the MEG3a probe as described above. After colorization, the same sections were used to perform immunohistochemical staining with the anti-FSH- $\beta$  antibody. The sections were rinsed briefly with PBS, incubated with 1% BSA in PBS at room temperature for 30 min, and then incubated with the anti-FSH- $\beta$  antibody in PBS (1:500 dilution) for 1 h. After washes with PBS, the sections were incubated with a secondary antibody in PBS (antirabbit



IgG conjugated with rhodamine) at room temperature for 1 h and washed with PBS. After the sections were mounted with Gel/Mount (Biomedica Corp., Foster City, CA), the images for the hybridization and immunostaining signals were photographed using a Nikon dual-field microscope (bright field for the *in situ* hybridization and fluorescence for the immunostaining) and analyzed with Adobe Photoshop software (Adobe Systems Inc., San Jose CA).

#### Cell culture and colony formation assays

Human cervical carcinoma cell line HeLa, breast adenocarcinoma MCF-7, and neuroglioma H4 were obtained from American Type Culture Collection (Manassas, VA) and cultured in DMEM with 10% fetal bovine serum (Invitrogen), incubated at 37°C with a humidified atmosphere of 5% CO<sub>2</sub>. The colony formation assays were performed as described previously (15).

#### Growth rate assay of the transfected cells

Using the Lipofectamine Plus Reagent (Invitrogen) according to the manufacturer's protocol, we cotransfected HeLa cells in 100-mm culture dishes with expression construct pCI-neo (blank vector; Promega), pCI-neo-LacZ (negative control), pCI-neo-MEG3a, or pCI-neo-GADD45γ (positive control) (15), along with the plasmid pMACS K<sup>k</sup>.II (Miltenyi Biotec, Auburn, CA), which expresses a truncated mouse H-2K<sup>k</sup> molecule as a cell surface marker. The ratio between the expression construct and pMACS K<sup>k</sup>.II was 20:1. Forty-eight hours after the transfection, cells were collected and resuspended in 320 μl PBS with 5 mM EDTA and mixed with 80 μl MACSelect K<sup>k</sup> Microbeads (Miltenyi Biotec), which bind to the surface marker H-2K<sup>k</sup> expressed on the cell surface of the transfected cells. After incubation on ice for 15 min, the transfected cells were isolated by MS Separation Columns (Miltenyi Biotec) via magnetic separation according to the manufacturer's protocol. The purified cells were seeded on 6-well plates with 5 × 10<sup>4</sup> cells per well and cultured in the CO<sub>2</sub> incubator at 37°C. The growth rate of these transfected cells was determined by counting the cell numbers in each well at 48 and 72 h after plating.

### Results

#### Molecular cloning of MEG3a

Using cDNA-RDA, we identified individual cDNA fragments expressed highly in normal pituitary but lower or undetectable in clinically nonfunctioning pituitary tumors (15). Of a total of 309 fragments analyzed, 49 represented one cDNA fragment (16%). This cDNA fragment was used to screen a human fetal liver library. Positive clones from the library were identified and subcloned, and the DNA sequences were analyzed. All the positive cDNA clones contained DNA sequences very similar to the previously reported MEG3, a cDNA identified from the Human EST Database based on the homology to the mouse imprinting gene *Gtl2*, with an unknown function (16). However, these cDNA sequences from the cDNA library screening were not identical to MEG3, with an additional 141-bp DNA sequence inserted in the middle of the cDNAs (Fig. 1A). Therefore, we designated this particular cDNA as MEG3a. Two single-nucleotide insertions were also found in our cDNA clones but not in the MEG3 sequence published previously, presumably as a result of the previous sequencing error, because our cDNA sequences completely matched the Human Genome Sequence at the National Center for Biotechnology Information web site. The cDNA sequence of MEG3a has been submitted to GenBank (accession no. AY314975). No cDNA containing the exact sequence of the previously reported MEG3 was found among the positive cDNA clones obtained from our library screening. There were two putative

open reading frames (ORFs) within the cDNAs of MEG3a as well as MEG3 (Fig. 1A), however, no consensus Kozak sequence was identified for either ORF.

To understand the difference between MEG3, the previously reported cDNA obtained from the EST Database, and MEG3a, the cDNA that we cloned from human cDNA library screening, we analyzed the MEG3 gene structure by comparing these cDNA sequences with the human genome sequence working draft (<http://www.ncbi.nlm.nih.gov/genome/seq/>). The Blast search of the human genome sequence showed that the MEG3 gene was located on chromosome 14q32.3. Comparison of MEG3 cDNA isoform sequences and the human genomic sequence in this region revealed the MEG3 genomic structure (Fig. 1B). The difference of the insertion of a 141-bp DNA fragment between the MEG3a and the MEG3 sequence published previously was caused by the use of an extra exon 5 in the MEG3a cDNA, which is absent in MEG3, probably because of alternative splicing (Fig. 1B, open box). All the introns started with nucleotide sequence GT and ended with AG, standard donor and acceptor sites for RNA splicing in eukaryotes. Only one matched genomic sequence was detected in the human genome, suggesting that MEG3 is a single-copy gene.

#### Tissue distribution

We used a 200-bp N-terminal fragment of MEG3 cDNA as a probe to investigate its expression in different tissues. Hybridization with a quantitative human tissue RNA blot (Clontech), which was normalized with eight different housekeeping genes, revealed that MEG3 was highly expressed in the pituitary and cerebellum, as well as other areas of the brain. It was also expressed in placenta, adrenal gland, pancreas, and ovary, suggesting an endocrine-related function (Fig. 2).

Because MEG3 was identified in the normal human pituitary by comparing gene expression between the normal pituitary, which contains different cell types, and clinically nonfunctioning tumors, which were primarily gonadotroph derived, we performed *in situ* hybridization to determine whether MEG3 is expressed in normal human pituitary gonadotrophs. Using nonradioactive-labeled MEG3a cDNA as a probe (digoxigenin labeling system; Roche Molecular Biochemicals, Indianapolis, IN), we observed that scattered cells expressing MEG3 mRNA were widely distributed throughout the human anterior pituitary (Fig. 3A), but none were detected in the posterior pituitary (Fig. 3B). Next, immunohistochemical staining was performed on the same pituitary tissue section slide, using an antibody against FSH-β (obtained from Dr. A. F. Parlow, National Hormone and Peptide Program, National Institute of Diabetes and Digestive and Kidney Diseases), a gonadotroph-specific hormone. We were able to colocalize the expression of MEG3 mRNA and FSH-β protein in the same cells, indicating that MEG3 is expressed in normal gonadotrophs in the human pituitary (Fig. 3, C–E). However, other cells expressing MEG3 mRNA but not FSH-β were also observed (data not shown), indicating that MEG3 mRNA expression is not restricted to gonadotrophs.

FIG. 2. Tissue distribution of *MEG3* mRNA. p.g.\*, Para-central gyrus.

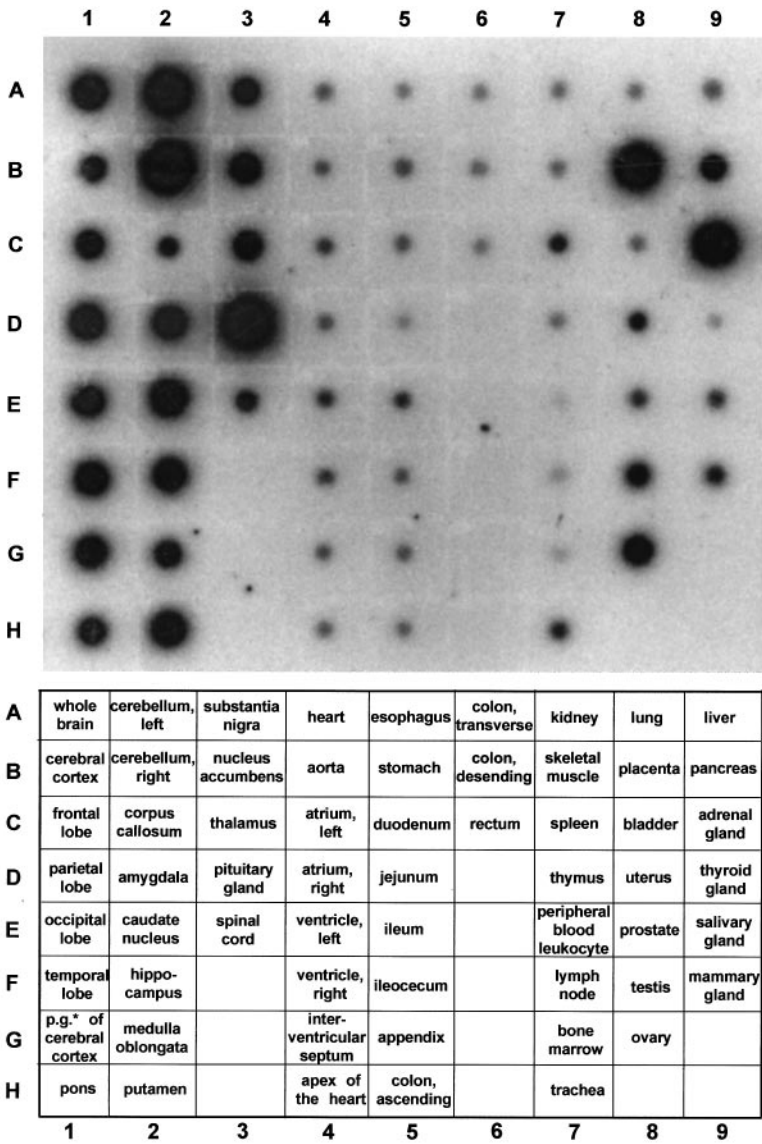

Lack of *MEG3* expression in human tumors

We next examined whether there were true differences in *MEG3* expression between normal and neoplastic pituitary cells, as well as in human carcinoma cell lines. Northern blot showed a *MEG3* mRNA of approximately 1700 nucleotides (1.7 K) in normal fibroblasts HS27 and WI38, but not in any human carcinoma cell lines examined (Fig. 4A). Because of sample size limitation, we could not examine most pituitary tumors by Northern blot. Therefore, RT-PCR was used to detect specific *MEG3a* isoform expression in different human pituitary tumor phenotypes. Figure 4B shows that there was no *MEG3a* expression in three GH-secreting tumors and eight clinically nonfunctioning pituitary tumors, in contrast to the five normal human pituitaries, using a primer set that will only amplify the *MEG3a* isoform but not the *MEG3* EST sequence reported previously. *MEG3a* was also undetectable in a human pituitary tumor-derived cell line, PDFS (18). As a positive control, cyclophilin A cDNA was detected in all samples by RT-PCR (data not shown). RT-PCR also con-

firmed *MEG3a* expression in the normal fibroblast cells HS27 and WI38 (data not shown). The identities of all PCR products have been verified by DNA sequence analysis. Therefore, the loss of *MEG3* expression is not restricted to gonadotroph tumors but also to tumors of other pituitary cell types as well as other human cancer cell lines.

*MEG3* inhibits cell proliferation of human carcinoma cell lines

Because *MEG3a* is highly expressed in normal pituitary cells and fibroblasts but undetectable in pituitary tumors and most human cancer cells, we hypothesized that the biological functions of *MEG3* may involve control of cell proliferation. To examine this possibility, the cDNA for the *MEG3a* isoform was cloned into a mammalian expression vector pCI-neo and used to transfect human cancer cell lines HeLa, MCF-7, and H4, which showed no *MEG3* mRNA expression in Northern analysis, to perform colony formation assays. Blank vector and similar expression vectors for  $\beta$ -galactosidase gene

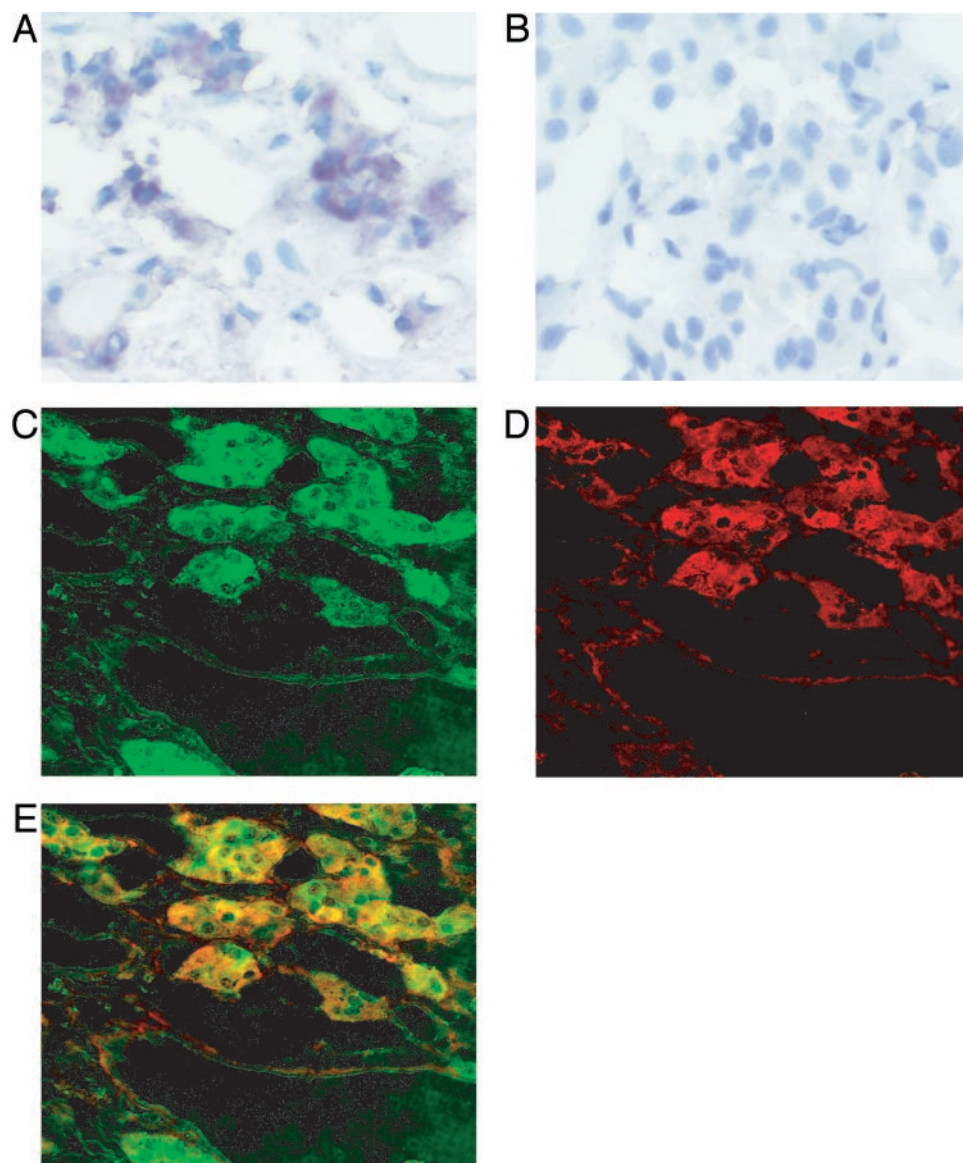

FIG. 3. Colocalization of *MEG3* mRNA with FSH protein. A, *In situ* hybridization with MEG3a cDNA shows *MEG3* expression in the normal human anterior pituitary. The cells containing *MEG3* mRNA are shown in dark brown, and cellular nuclei were stained with Mayer's hematoxylin, shown in blue. B, No *MEG3* mRNA was detected in the normal human posterior pituitary. C, An area in the human anterior pituitary rich in *MEG3*-positive cells (green). D, The same area with immunohistochemical staining using anti-FSH- $\beta$  antibody on the same slide. The cells containing FSH protein are shown in red. E, Overlapping images of C and D reveals co-expression of *MEG3* and FSH within the same cells (yellow).

(*LacZ*) and a known growth suppressor gene, *GADD45- $\gamma$*  (19), were used as controls. Transfection with the pCI-neo-MEG3a expression vector caused a 70% decrease in cell clone numbers in all of these cancer cell lines (Fig. 5, A and B). For controls, the *LacZ* expression vector produced similar colony numbers as the blank vector, whereas the expression vector for a known growth suppressor gene, *GADD45- $\gamma$* , caused an 85% decrease in colony numbers, similar to results reported previously (19, 20).

To confirm the growth suppression function of *MEG3*, we also examined the growth rate of HeLa cells transfected with the pCI-neo-MEG3a expression vector. After cotransfection with the selection plasmid pMACS K<sup>k</sup>.II, the transfected cells were purified by a magnetic separation column and the growth rate was determined by direct counting of cell number. As shown in Figure 5C, transfection of the pCI-neo-MEG3a expression vector resulted in a decrease in cell growth rate by 70% compared with the blank vector or a *LacZ* expression vector. Taken together, these data indicate that

expression of *MEG3* in tumor cells leads to an inhibition of cell proliferation, consistent with the observation that all human tumor cells examined do not express this gene.

### Discussion

We have identified a cDNA isoform from *MEG3*, a previously reported maternal imprinting gene with unknown function (16), in the normal human pituitary, which strongly suppresses cancer cell growth. Blot hybridization and RT-PCR revealed that *MEG3* mRNA is expressed in the normal pituitary but is not present in pituitary tumors and human cancer cell lines.

*MEG3* was first discovered as the human homolog of a mouse gene, *Gtl2*. *Gtl2* was identified as an imprinting gene by gene trapping (21). Transgenic mice *Gtl2<sup>lacZ</sup>* bearing insertion mutations close to this gene locus are considerably smaller than the normal mice (with ~60% of body weight of nontransgenic mice), starting at d 16.5 of embryonic devel-



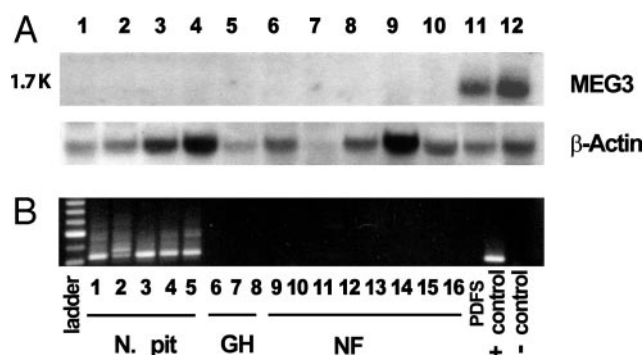

FIG. 4. A, *MEG3* mRNA is expressed in the normal human fibroblast cells but is undetectable in human cancer cell lines by Northern blot. Lanes 1–10, Human carcinoma cells HeLa, MCF-7, T47-D, T24, 5637, Du145, K562, HT29, H1299, H4; lanes 11 and 12, human normal fibroblasts HS-27 and WI38. B, RT-PCR shows that *MEG3a* is expressed in the normal human pituitary but not in pituitary tumors. N. pit., RNA from the normal human pituitary; GH, RNA from GH-secreting pituitary tumors; NF, RNA from clinically nonfunctioning pituitary tumors; PDFTS, RNA from a human pituitary tumor-derived folliculostellate cell line (18); + control, PCR performed with cloned *MEG3* cDNA as a template; – control, PCR performed in the absence of the template.

opment and throughout the postnatal growth period (21). Thus, it was originally proposed that the function of *Gtl2* may be involved in growth control during early development. Several groups subsequently reported that *Gtl2/Meg3* is closely linked to another imprinting gene, *Dlk1* (22–25). *Dlk1* encodes a transmembrane protein containing six epidermal growth factor repeat motifs closely related to those present in the  $\delta$ /notch/serrate family of signaling molecules (26, 27), and it has been shown to modulate proliferation and differentiation of preadipocytes, stromal cells, and hematopoietic progenitor cells (28–32). Interestingly, *Dlk1* is induced by GH in the fetal and maternal pancreas, leading to increased  $\beta$ -cell proliferation and insulin production (33). Based on the most recent evidence, it has been proposed that the previously observed dwarfism in *Gtl2<sup>lacZ</sup>* mice is likely caused by the destruction of a regulatory element for *Dlk1* function positioned at the 3' end of the *Dlk1* gene, because the *lacZ* insertion is located between the *Dlk1* and *Gtl2* genes and at the 3' end of the *Dlk1* gene (23). However, the function of *Gtl2/Meg3* remained undetermined until now, when we found that *MEG3a*, a cDNA isoform from human *MEG3*, functions to inhibit cell growth.

The *MEG3a* cDNA that we have identified is an isoform of the previously reported *MEG3*. Among the multiple positive clones obtained from our screening of a human fetal liver library, none of them contains the exact sequence as the *MEG3* cDNA sequence reported previously, suggesting that *MEG3* mRNA does not represent a major form of transcript, at least in the fetal liver. The difference in the sequences of *MEG3* and *MEG3a* cDNA was generated by the use of an additional exon in the middle of the cDNA of the *MEG3a*. It has been reported that the *Gtl2* gene, the mouse homolog of human *MEG3*, also encodes multiple alternatively spliced transcripts (34). The physiological significance of the multiple alternatively spliced isoforms is currently unknown. Because of the lack of a Kozak sequence, it is unknown whether the two putative ORFs within the *MEG3* cDNA encode for

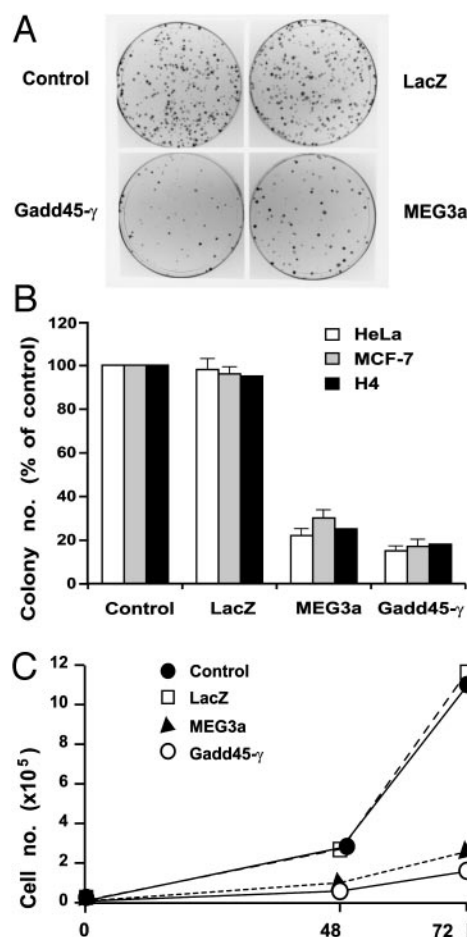

FIG. 5. *MEG3a* suppresses tumor cell growth. A, H4 cells were transfected with the blank vector pCI-neo (control) or expression vector for *LacZ*, *MEG3*, or *GADD45-γ*. After 2 wk of neomycin selection, the plates were fixed and stained with crystal violet solution. B, Viable colonies of HeLa, MCF-7, and H4 cells in similar experiments were counted and normalized to control. The data are represented as mean  $\pm$  SD for counts from at least three independent experiments. C, HeLa cells were cotransfected with expression construct pCI-neo, pCI-neo-*LacZ*, pCI-neo-*MEG3a*, or pCI-neo-*GADD45-γ*, along with the plasmid pMACS K<sup>k</sup>.II for selection. After purification with a magnetic column, the growth rate for the transfected cells was determined by direct counting.

functional proteins. There is no evidence that *MEG3* gene products are expressed at the protein level. It has been suggested that the transcripts from this gene may act as RNAs based solely on the lack of a Kozak sequence (34). In the current study, we have only focused on the newly identified *MEG3a* isoform, based on its functional activities to suppress tumor growth and its discovery from the original RDA comparing normal human pituitary tissue and pituitary tumors. It will be of interest in future studies to compare *MEG3* and *MEG3a*.

In colony formation and growth rate assays, *MEG3a* exhibited a strong ability to inhibit cell growth and proliferation even in several extremely malignant and fast-growing human cancer cell lines, such as cervical carcinoma HeLa, breast adenocarcinoma MCF-7, and neuroglioma H4, indicating its powerful function to suppress cell growth. It is unknown whether this growth-suppressive function is me-

diated by the RNA transcript or an unknown translated protein. At the present time, there is no direct evidence that MEG3a can regulate pituitary tumor cell growth or the loss of MEG3a expression can result in pituitary tumor formation. However, its strong activity to cause growth suppression and its expression in the normal gonadotrophs but absence in the gonadotroph-derived tumors suggest that it may play an important role in the maintenance of normal gonadotroph cell growth. Additional investigations using an animal model will be critical to address whether the loss of MEG3 gene function is directly associated with tumor development. The MEG3 gene is located at chromosome 14q32.3. Interestingly, abnormalities at this locus are observed frequently in meningiomas (35–40). For examples, genomic alterations of chromosome 14q32.2 have been observed in approximately 50% of aggressive meningiomas (40, 41). Therefore, it has been suggested that there is a potential tumor suppressor gene at this chromosomal location associated with the pathogenesis and progression of meningiomas (41). As shown here for the first time, the expression of the MEG3 gene at this exact locus is lost in the majority of human pituitary adenomas. Functionally, we have shown that MEG3a has a strong ability to inhibit proliferation of several malignant human carcinoma cell lines. Taken together, these exciting new findings suggest MEG3 as a candidate tumor suppressor gene at chromosome 14q32.3, the deletion or mutation of which may be involved in the pathogenesis of human pituitary adenomas and other tumors.

### Acknowledgments

We thank Drs. Y. Huang and D. Brown (Renal Unit, Massachusetts General Hospital) and Dr. M. E. Shomali (Endocrine Unit, Massachusetts General Hospital) for kind help in *in situ* hybridization and immunohistochemistry; Dr. A. F. Parlow (Harbor-UCLA Medical Center, Torrance, CA) and the National Hormone and Peptide Program of the National Institute of Diabetes and Digestive and Kidney Diseases for providing antibody against human FSH- $\beta$ ; and the Harvard Brain Tissue Resource Center (supported by United States Public Health Service Grant MH/NS 31862) for providing the normal human pituitary tissue.

Received February 27, 2003. Accepted July 28, 2003.

Address all correspondence and requests for reprints to: Anne Klibanski, M.D., Neuroendocrine Unit, Massachusetts General Hospital, 55 Fruit Street, BUL 457B, Boston, Massachusetts 02114. E-mail: aklibanski@partners.org.

This work was supported in part by National Institutes of Health Grant R01-DK-40947, American Cancer Society Grant IRG-87-007-13, the Massachusetts General Hospital/Giovanni Armenise Neuro-Oncology and Related Disorder Program, and the Jarislowsky Foundation.

Present address for K.R.M.: Comprehensive Cancer Center, University of California at San Francisco, San Francisco, California 94143.

### References

- Kontogeorgos G, Kovacs K, Horvath E, Scheithauer BW 1991 Multiple adenomas of the human pituitary. A retrospective autopsy study with clinical implications. *J Neurosurg* 74:243–247
- Molitch ME, Russell EJ 1990 The pituitary “incidentaloma.” *Ann Intern Med* 112:925–931
- Klibanski A, Zervas NT 1991 Diagnosis and management of hormone-secreting pituitary adenomas. *N Engl J Med* 324:822–831
- Alexander JM, Biller BM, Bikkal H, Zervas NT, Arnold A, Klibanski A 1990 Clinically nonfunctioning pituitary tumors are monoclonal in origin. *J Clin Invest* 86:336–340
- Biller BM, Alexander JM, Zervas NT, Hedley-Whyte ET, Arnold A, Klibanski A 1992 Clonal origins of adrenocorticotropin-secreting pituitary tissue in Cushing’s disease. *J Clin Endocrinol Metab* 75:1303–1309
- Herman V, Drazin NZ, Gonsky R, Melmed S 1993 Molecular screening of pituitary adenomas for gene mutations and rearrangements. *J Clin Endocrinol Metab* 77:50–55
- Shimon I, Melmed S 1997 Genetic basis of endocrine disease: pituitary tumor pathogenesis. *J Clin Endocrinol Metab* 82:1675–1681
- Asa SL, Ezzat S 1998 The cytogenesis and pathogenesis of pituitary adenomas. *Endocr Rev* 19:798–827
- Faglia G, Spada A 2001 Genesis of pituitary adenomas: state of the art. *J Neurooncol* 54:95–110
- Pei L, Melmed S 1997 Isolation and characterization of a pituitary tumor-transforming gene (PTTG). *Mol Endocrinol* 11:433–441
- Dominguez A, Ramos-Morales F, Romero F, Rios RM, Dreyfus F, Tortolero M, Pintor-Toro JA 1998 hpttg, a human homologue of rat pttg, is overexpressed in hematopoietic neoplasms. Evidence for a transcriptional activation function of hPTTG. *Oncogene* 17:2187–2193
- Zhang X, Horwitz GA, Prezant TR, Valentini A, Nakashima M, Bronstein MD, Melmed S 1999 Structure, expression, and function of human pituitary tumor-transforming gene (PTTG). *Mol Endocrinol* 13:156–166
- Zhang X, Horwitz GA, Heaney AP, Nakashima M, Prezant TR, Bronstein MD, Melmed S 1999 Pituitary tumor transforming gene (PTTG) expression in pituitary adenomas. *J Clin Endocrinol Metab* 84:761–767
- Saez C, Japon MA, Ramos-Morales F, Romero F, Segura DI, Tortolero M, Pintor-Toro JA 1999 hpttg is over-expressed in pituitary adenomas and other primary epithelial neoplasias. *Oncogene* 18:5473–5476
- Zhang X, Sun H, Danila DC, Johnson SR, Zhou Y, Swearingen B, Klibanski A 2002 Loss of expression of GADD45 gamma, a growth inhibitory gene, in human pituitary adenomas: implications for tumorigenesis. *J Clin Endocrinol Metab* 87:1262–1267
- Miyoshi N, Wagatsuma H, Wakana S, Shiroishi T, Nomura M, Aisaka K, Kohda T, Surani MA, Kaneko-Ishino T, Ishino F 2000 Identification of an imprinting gene, Meg3/Gtl2 and its human homologue MEG3, first mapped on mouse distal chromosome 12 and human chromosome 14q. *Genes Cells* 5:211–220
- Zhang X, Danila DC, Katai M, Swearingen B, Klibanski A 1999 Expression of prolactin-releasing peptide and its receptor messenger ribonucleic acid in normal human pituitary and pituitary adenomas. *J Clin Endocrinol Metab* 84:4652–4655
- Danila DC, Zhang X, Zhou Y, Dickens GR, Fletcher JA, Hedley-Whyte ET, Selig MK, Johnson SR, Klibanski A 2000 A human pituitary tumor-derived folliculostellate cell line. *J Clin Endocrinol Metab* 85:1180–1187
- Takekawa M, Saito H 1998 A family of stress-inducible GADD45-like proteins mediate activation of the stress-responsive MTK1/MEKK4 MAPKKK. *Cell* 95:521–530
- Zhang W, Bae I, Krishnaraju K, Azam N, Fan W, Smith K, Hoffman B, Liebermann DA 1999 CR6: A third member in the MyD118 and Gadd45 gene family which functions in negative growth control. *Oncogene* 18:4899–4907
- Schuster-Gossler K, Simon-Chazottes D, Guenet JL, Zachgo J, Gossler A 1996 Gtl2<sup>lacZ</sup>, an insertional mutation on mouse chromosome 12 with parental origin-dependent phenotype. *Mamm Genome* 7:20–24
- Schmidt JV, Matteson PG, Jones BK, Guan XJ, Tilghman SM 2000 The Dlk1 and Gtl2 genes are linked and reciprocally imprinted. *Genes Dev* 14:1997–2002
- Takada S, Tevendale M, Baker J, Georgiades P, Campbell E, Freeman T, Johnson MH, Paulsen M, Ferguson-Smith AC 2000 Delta-like and gtl2 are reciprocally expressed, differentially methylated linked imprinted genes on mouse chromosome 12. *Curr Biol* 10:1135–1138
- Wylie AA, Murphy SK, Orton TC, Jirtle RL 2000 Novel imprinted DLK1/GTL2 domain on human chromosome 14 contains motifs that mimic those implicated in IGF2/H19 regulation. *Genome Res* 10:1711–1718
- Kobayashi S, Wagatsuma H, Ono R, Ichikawa H, Yamazaki M, Tashiro H, Aisaka K, Miyoshi N, Kohda T, Ogura A, Ohki M, Kaneko-Ishino T, Ishino F 2000 Mouse Peg9/Dlk1 and human PEG9/DLK1 are paternally expressed imprinted genes closely located to the maternally expressed imprinted genes: mouse Meg3/Gtl2 and human MEG3. *Genes Cells* 5:1029–1037
- Lee YL, Helman L, Hoffman T, Laborda J 1995 dlk, pG2 and Pref-1 mRNAs encode similar proteins belonging to the EGF-like superfamily. Identification of polymorphic variants of this RNA. *Biochim Biophys Acta* 1261:223–232
- Lendahl U 1998 A growing family of Notch ligands. *Bioessays* 20:103–107
- Bauer SR, Ruiz-Hidalgo MJ, Rudikoff EK, Goldstein J, Laborda J 1998 Modulated expression of the epidermal growth factor-like homeotic protein dlk influences stromal-cell-pre-B-cell interactions, stromal cell adipogenesis, and pre-B-cell interleukin-7 requirements. *Mol Cell Biol* 18:5247–5255
- Apelqvist A, Li H, Sommer L, Beatus P, Anderson DJ, Honjo T, Hrabe de Angelis M, Lendahl U, Edlund H 1999 Notch signalling controls pancreatic cell differentiation. *Nature* 400:877–881
- Garces C, Ruiz-Hidalgo MJ, Bonvini E, Goldstein J, Laborda J 1999 Adipocyte differentiation is modulated by secreted delta-like (dlk) variants and requires the expression of membrane-associated dlk. *Differentiation* 64:103–114
- Han W, Ye Q, Moore MA 2000 A soluble form of human delta-like-1 inhibits differentiation of hematopoietic progenitor cells. *Blood* 95:1616–1625

32. Ohno N, Izawa A, Hattori M, Kageyama R, Sudo T 2001 dlk inhibits stem cell factor-induced colony formation of murine hematopoietic progenitors: Hes-1-independent effect. *Stem Cells* 19:71–79
33. Carlsson C, Tornehave D, Lindberg K, Galante P, Billestrup N, Michelsen B, Larsson LI, Nielsen JH 1997 Growth hormone and prolactin stimulate the expression of rat preadipocyte factor-1/delta-like protein in pancreatic islets: molecular cloning and expression pattern during development and growth of the endocrine pancreas. *Endocrinology* 138:3940–3948
34. Schuster-Gossler K, Bilinski P, Sado T, Ferguson-Smith A, Gossler A 1998 The mouse Gtl2 gene is differentially expressed during embryonic development, encoding multiple alternatively spliced transcripts, and may act as an RNA. *Dev Dyn* 212:214–218
35. Schneider BF, Shashi V, von Kap-herr C, Golden WL 1995 Loss of chromosomes 22 and 14 in the malignant progression of meningiomas. A comparative study of fluorescence in situ hybridization (FISH) and standard cytogenetic analysis. *Cancer Genet Cytogenet* 85:101–104
36. Simon M, von Deimling A, Larson JJ, Wellenreuther R, Kaskel P, Waha A, Warnick RE, Tew Jr JM, Menon AG 1995 Allelic losses on chromosomes 14, 10, and 1 in atypical and malignant meningiomas: a genetic model of meningioma progression. *Cancer Res* 55:4696–5701
37. Weber RG, Bostrom J, Wolter M, Baudis M, Collins VP, Reifenberger G, Lichter P 1997 Analysis of genomic alterations in benign, atypical, and anaplastic meningiomas: toward a genetic model of meningioma progression. *Proc Natl Acad Sci USA* 94:14719–14724
38. Menon AG, Rutter JL, von Sattel JP, Synder H, Murdoch C, Blumenfeld A, Martuza RL, von Deimling A, Gusella JF, Houseal TW 1997 Frequent loss of chromosome 14 in atypical and malignant meningioma: identification of a putative “tumor progression” locus. *Oncogene* 14:611–616
39. Tse JY, Ng HK, Lau KM, Lo KW, Poon WS, Huang DP 1997 Loss of heterozygosity of chromosome 14q in low- and high-grade meningiomas. *Hum Pathol* 28:779–785
40. Leone PE, Bello MJ, de Campos JM, Vaquero J, Sarasa JL, Pestana A, Rey JA 1999 NF2 gene mutations and allelic status of 1p, 14q and 22q in sporadic meningiomas. *Oncogene* 18:2231–2239
41. Louis DN, Scheithauer BW, Budka H, von Deimling A, Kepes JJ 2000 Meningiomas. In: Kleihues PCW, ed. *Pathology and genetics of tumours of the nervous system*. Lyon, France: IARC Press; 176–184
